# Supplementary material for: Antibodies against Two Testudinid Herpesviruses in Pet Tortoises in Europe
Source: MDPI journal article supplement (doi:10.3390/ani12172298), 2022-09-05
Supplement: s1 [file s1]

**Supplementary Table S1** Detection rate of antibodies against testudinid herpesvirus 1 (TeHV1) and testudinid herpesvirus 3 (TeHV3) depending on country of sample origin. Results shown as: number (n), percent, 95% confidence interval (CI).

| Country     | Total tested |    | TeHV1 antibodies |              |           |            | TeHV3 antibodies |              |           |              |
|-------------|--------------|----|------------------|--------------|-----------|------------|------------------|--------------|-----------|--------------|
|             |              |    | Titer <2         | Titer 2 to 4 | Titer 8   | Titer ≥16  | Titer <2         | Titer 2 to 4 | Titer 8   | Titer ≥16    |
| Germany     | 1102         | n  | 1064             | 14           | 8         | 16         | 1062             | 17           | 10        | 13           |
|             |              | %  | 96.55            | 1.27         | 0.73      | 1.45       | 96.37            | 1.54         | 0.91      | 1.18         |
|             |              | CI | 95.33-97.49      | 0.75-2.11    | 0.36-1.42 | 0.90-2.34  | 95.09-97.32      | 0.96-2.45    | 0.5-1.67  | 0.69-2.01    |
| Switzerland | 174          | n  | 170              | 2            | 1         | 1          | 154              | 7            | 3         | 10           |
|             |              | %  | 97.71            | 1.15         | 0.57      | 0.57       | 88.51            | 4.02         | 1.72      | 5.75         |
|             |              | CI | 94.24-99.10      | 0.32-4.09    | 0.10-3.18 | 0.10-3.18  | 82.92-92.44      | 1.96-8.07    | 0.59-4.94 | 3.15-10.26   |
| France      | 102          | n  | 92               | 3            | 1         | 6          | 95               | 5            | 0         | 2            |
|             |              | %  | 90.20            | 2.94         | 0.98      | 5.88       | 93.14            | 4.90         | 0.0       | 1.96         |
|             |              | CI | 82.89-94.59      | 1.00-8.29    | 0.17-5.35 | 2.72-12.24 | 86.51-96.64      | 2.11-10.96   | 0-3.63    | 0.5485-10.55 |
| Italy       | 85           | n  | 81               | 3            | 0         | 1          | 74               | 7            | 0         | 4            |
|             |              | %  | 95.29            | 3.53         | 0.0       | 1.18       | 87.05            | 8.24         | 0.0       | 4.71         |
|             |              | CI | 88.51-98.15      | 1.21-9.87    | 0-4.32    | 0.21-6.37  | 78.30-92.62      | 4.05-16.04   | 0-4.32    | 1.85-11.49   |

|                |    |    |              |             |             |             |              |             |             |             |
|----------------|----|----|--------------|-------------|-------------|-------------|--------------|-------------|-------------|-------------|
| Austria        | 81 | n  | 80 (%; CI %) | 0 (%; CI %) | 0 (%; CI %) | 1 (%; CI %) | 81 (%; CI %) | 0 (%; CI %) | 0 (%; CI %) | 0 (%; CI %) |
|                |    | %  | 98.77        | 0.0         | 0.0         | 1.23        | 100          | 0.0         | 0.0         | 0.0         |
|                |    | CI | 93.34-99.78  | 0-4.53      | 0-4.53      | 0.22-6.66   | 95.47-100    | 0-4.53      | 0-4.53      | 0-4.53      |
| Spain          | 75 | n  | 74           | 1           | 0           | 0           | 75           | 0           | 0           | 0           |
|                |    | %  | 98.67        | 1.33        | 0.0         | 0.0         | 100          | 0.0         | 0.0         | 0.0         |
|                |    | CI | 92.83-99.77  | 0.23-7.17   | 0-4.87      | 0-4.87      | 95.13-100    | 0-4.87      | 0-4.87      | 0-4.87      |
| Netherlands    | 36 | n  | 36           | 0           | 0           | 0           | 35           | 1           | 0           | 0           |
|                |    | %  | 100          | 0.0         | 0.0         | 0.0         | 97.22        | 2.78        | 0.0         | 0.0         |
|                |    | CI | 90.36-100    | 0-9.64      | 0-9.64      | 0-9.64      | 85.83-99.51  | 0.49-14.17  | 0-9.64      | 0-9.64      |
| Belgium        | 29 | n  | 29           | 0           | 0           | 0           | 29           | 0           | 0           | 0           |
|                |    | %  | 100          | 0.0         | 0.0         | 0.0         | 100          | 0.0         | 0.0         | 0.0         |
|                |    | CI | 88.30-100    | 0-11.70     | 0-11.70     | 0-11.70     | 88.30-100    | 0-11.70     | 0-11.70     | 0-11.70     |
| United Kingdom | 23 | n  | 21           | 1           | 1           | 0           | 21           | 0           | 1           | 1           |
|                |    | %  | 91.30        | 4.35        | 4.35        | 0.0         | 91.30        | 0.0         | 4.35        | 4.35        |
|                |    | CI | 67.88-95.46  | 0.77-20.99  | 0.77-20.99  | 0-14.31     | 73.20-97.58  | 0-14.31     | 0.77-20.99  | 0.77-20.99  |
| Luxemburg      | 7  | n  | 7            | 0           | 0           | 0           | 7            | 0           | 0           | 0           |

|                |      |    |           |         |         |         |           |         |         |         |
|----------------|------|----|-----------|---------|---------|---------|-----------|---------|---------|---------|
|                |      | %  | 100       | 0.0     | 0.0     | 0.0     | 100       | 0.0     | 0.0     | 0.0     |
|                |      | CI | 64.57-100 | 0-35.43 | 0-35.43 | 0-35.43 | 64.57-100 | 0-35.43 | 0-35.43 | 0-35.43 |
| Czech Republic | 5    | n  | 5         | 0       | 0       | 0       | 5         | 0       | 0       | 0       |
|                |      | %  | 100       | 0.0     | 0.0     | 0.0     | 100       | 0.0     | 0.0     | 0.0     |
|                |      | CI | 56.55-100 | 0-43.45 | 0-43.45 | 0-43.45 | 56.55-100 | 0-43.45 | 0-43.45 | 0-43.45 |
| Poland         | 5    | n  | 5         | 0       | 0       | 0       | 5         | 0       | 0       | 0       |
|                |      | %  | 100       | 0.0     | 0.0     | 0.0     | 100       | 0.0     | 0.0     | 0.0     |
|                |      | CI | 56.55-100 | 0-43.45 | 0-43.45 | 0-43.45 | 56.55-100 | 0-43.45 | 0-43.45 | 0-43.45 |
| Norway         | 4    | n  | 4         | 0       | 0       | 0       | 4         | 0       | 0       | 0       |
|                |      | %  | 100       | 0.0     | 0.0     | 0.0     | 100       | 0.0     | 0.0     | 0.0     |
|                |      | CI | 51.01-100 | 0-48.99 | 0-48.99 | 0-48.99 | 51.01-100 | 0-48.99 | 0-48.99 | 0-48.99 |
| Total          | 1728 |    | 1668      | 24      | 11      | 25      | 1647      | 37      | 14      | 30      |
